# Supplementary material for: Crystal structures of Moorella thermoacetica cyanuric acid hydrolase reveal conformational flexibility and asymmetry important for catalysis
Source: PLOS journal article supplement (doi:10.1371/journal.pone.0216979), 2019-06-10
Supplement: S6 (10.1371/journal.pone.0216979.s006) [file journal.pone.0216979.s006]

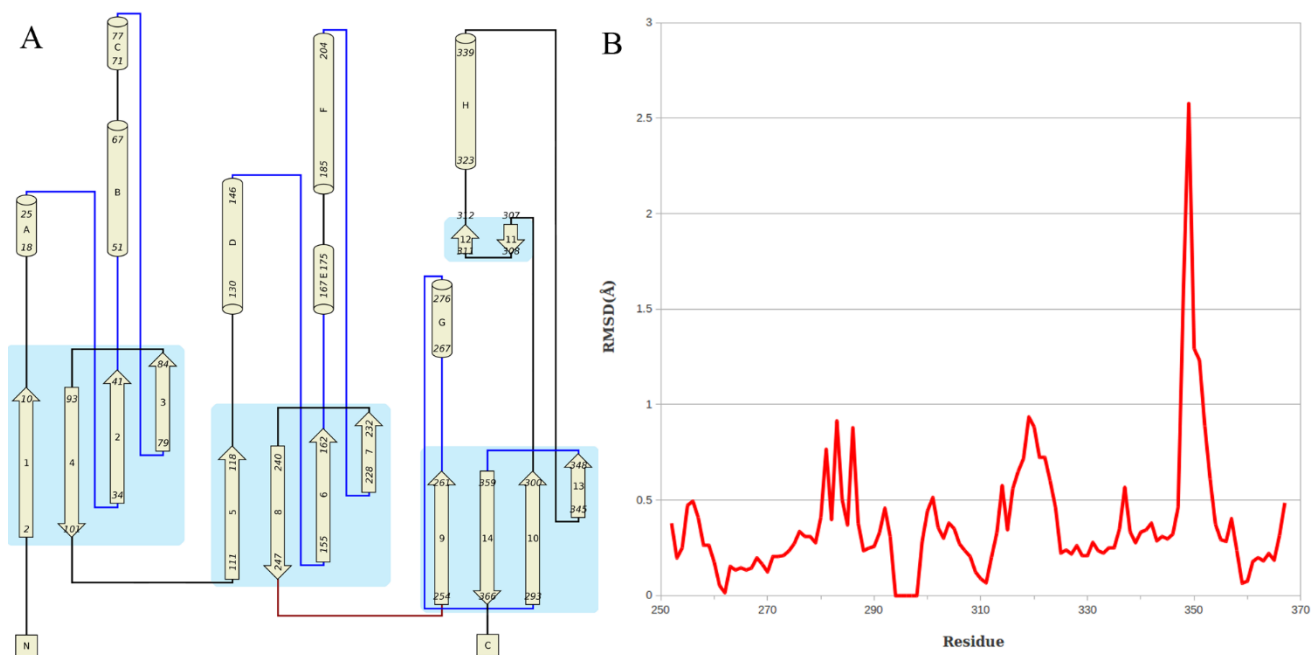

**S2 Fig. A.** 2D diagram of the 3-domain architecture of RMCAH, generated using Pro-origami (Stivala et al., 2011). Each domain consists a 4-stranded  $\beta$ -sheet. Domain 1 and 2 have three  $\alpha$ -helices, whereas in domain 3, the helix 2 in domain 1 is changed to a small 2-pleated  $\beta$ -sheet. **B.** Per residue C $\alpha$  distances between the open and closed conformation for domain 3. The segment with biggest r.m.s.d. connects the active site and the Ca<sup>2+</sup> binding site.

Stivala, A., Wybrow, M., Wirth, A., Whisstock, J. C., and Stuckey, P. J. (2011) Automatic generation of protein structure cartoons with Pro-origami. *Bioinformatics (Oxford, England)* **27**, 3315-3316
