# Supplementary material for: Crystal structures of Moorella thermoacetica cyanuric acid hydrolase reveal conformational flexibility and asymmetry important for catalysis
Source: PLOS journal article supplement (doi:10.1371/journal.pone.0216979), 2019-06-10
Supplement: S8 (10.1371/journal.pone.0216979.s008) [file journal.pone.0216979.s008]

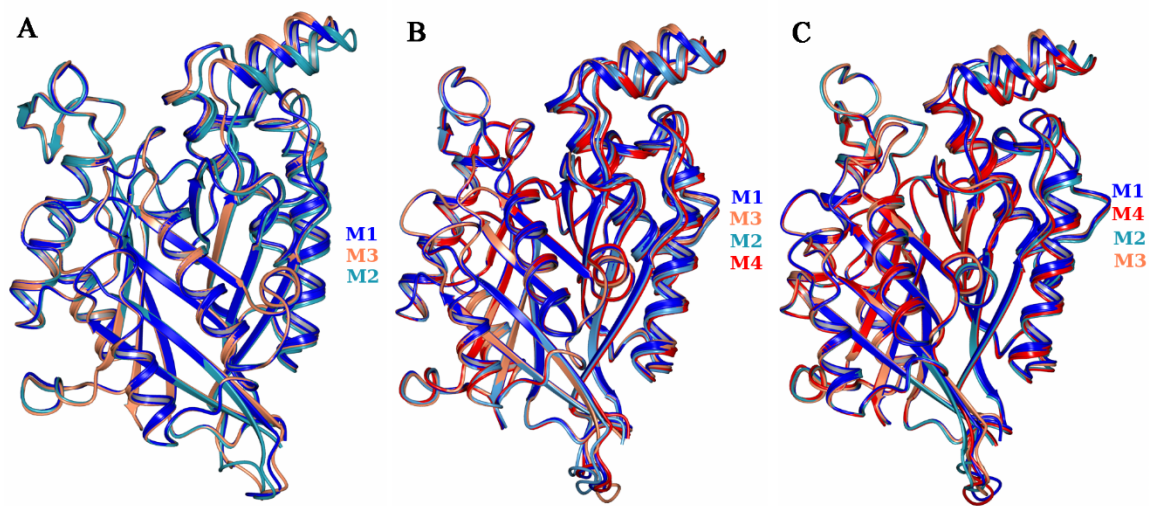

**S4 Fig.** Comparison of the structures of individual monomers for the RMCAH/CYA complex (A), RMCAH/ACE complex (B), and RMCAH/BAR complex (C). M4 in the RMCAH/CYA complex that takes the open (APO) conformation is omitted for clarity. Note variation between the monomers seen in the substrate entry channel, highlighted in Figures 5A and 6B.
