# Supplementary material for: Crystal structures of Moorella thermoacetica cyanuric acid hydrolase reveal conformational flexibility and asymmetry important for catalysis
Source: PLOS journal article supplement (doi:10.1371/journal.pone.0216979), 2019-06-10
Supplement: S9 (10.1371/journal.pone.0216979.s009) [file journal.pone.0216979.s009]

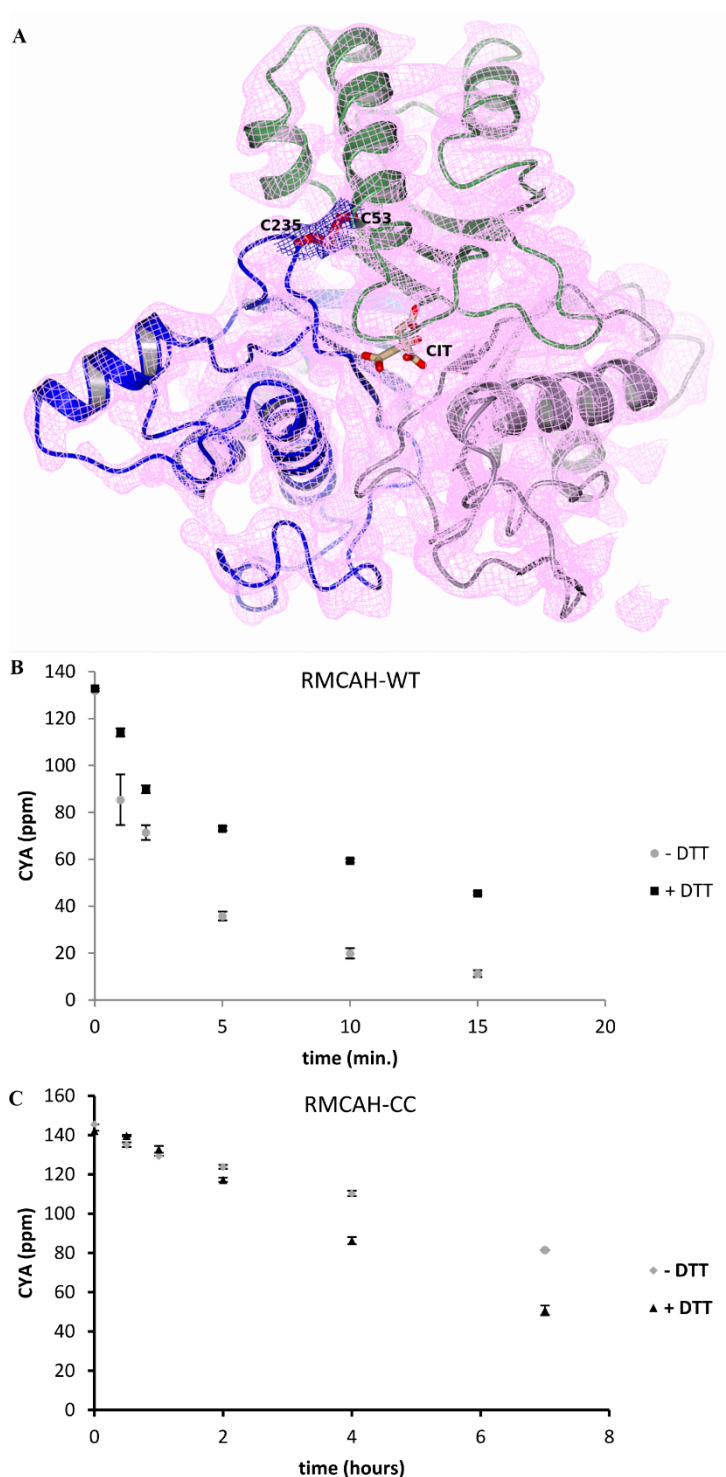

**S5 Fig. A.** The crystal structure of RMCAH (C46S/C162A/C218V/G53C/E235C) with the domain-2 locked in a partially open conformation, overlaid with the 2mFo-DFc electron density contoured at 1.0  $\sigma$ . Blue mesh highlights electron density for the disulfide bond. A citrate molecule occupies the active site but electron density for the citrate is omitted for clarity. **B** and **C.** Activities of the re-engineered *Moorella* CAH (RMCAH) and its double mutant RMCAH-CC (G53C/E235C) tested in reducing (10 mM dithiothreitol) and non-reducing (no dithiothreitol) conditions.
